# Supplementary material for: Mental Health Service Use by Medicaid-Enrolled Children and Adolescents in Primary Care Safety-Net Clinics
Source: Atypon-hosted journal article supplement (doi:10.1176/appi.ps.201800540), 2020-01-21
Supplement: appi.ps.201800540.ds001.pdf [file appi.ps.201800540.ds001.pdf]

**Appendix Table 1: ICD9-CM codes of mental health and physical health co-morbidities**

| Condition                                                 | ICD9-CM Code                                                   |
|-----------------------------------------------------------|----------------------------------------------------------------|
| Mental health comorbidity                                 |                                                                |
| Attention deficit hyperactivity disorder (ADHD)           | 314.00, 314.01, 314.1, 314.2, 314.8, 314.9                     |
| Any depressive disorder                                   | 296.2, 296.3, 300.4, 311                                       |
| Major depression                                          | 296.2, 296.3                                                   |
| Dysthymia                                                 | 300.4                                                          |
| Depression NOS                                            | 311                                                            |
| Conduct disorder / oppositional defiant disorder (CD/ODD) | 312.81, 312.82, 312.89, 313.81, 312.9                          |
| Other mental health disorder                              |                                                                |
| Anxiety disorder                                          | 300.0-300.3, 300.5-300.9                                       |
| Bipolar disorder                                          | 296.0-296.1, 296.4-296.9                                       |
| Schizophrenia / other psychotic disorder                  | 295, 297.0-297.3, 297.8-298.4, 298.8-298.9                     |
| Any other mental health disorder                          | 291-294, 299, 301, 306-310, 312 excluding CD/ODD, 313, 315-316 |
|                                                           |                                                                |
| Physical health comorbidity                               |                                                                |
| Asthma                                                    | 493                                                            |

**Appendix Table 2:** Characteristics of Medicaid-enrolled children and adolescents receiving ADHD-related visits (N=6,433) or depression-related visits (N=13,209), by primary care safety-net setting (FQHC or RHC)

|                                                             | ADHD-related visits in FQHC or RHC |       |                                        |        |                                                 |         | Depression-related visits in FQHC or RHC |       |                                        |         |                                                 |         |
|-------------------------------------------------------------|------------------------------------|-------|----------------------------------------|--------|-------------------------------------------------|---------|------------------------------------------|-------|----------------------------------------|---------|-------------------------------------------------|---------|
|                                                             | No visit in FQHC or RHC [N=5,566]  |       | Any visit in FQHC [N=354] <sup>±</sup> |        | Any visit in RHC (no FQHC) [N=513] <sup>±</sup> |         | No visit in FQHC or RHC [N=12,266]       |       | Any visit in FQHC [N=482] <sup>±</sup> |         | Any visit in RHC (no FQHC) [N=461] <sup>±</sup> |         |
|                                                             | N                                  | %     | N                                      | %      | N                                               | %       | N                                        | %     | N                                      | %       | N                                               | %       |
| <i>Demographics</i>                                         |                                    |       |                                        |        |                                                 |         |                                          |       |                                        |         |                                                 |         |
| Race/ethnicity, %                                           |                                    |       |                                        |        |                                                 |         |                                          |       |                                        |         |                                                 |         |
| Non-Hispanic White                                          | 2,560                              | 46.0  | 156                                    | 44.1   | 327                                             | 63.7*** | 5,770                                    | 47.0  | 221                                    | 45.9    | 323                                             | 70.1*** |
| Black                                                       | 1,703                              | 30.6  | 110                                    | 31.1   | 99                                              | 19.3*** | 3,863                                    | 31.5  | 130                                    | 27.0*   | 79                                              | 17.1*** |
| Hispanic                                                    | 827                                | 14.9  | 53                                     | 15.0   | 57                                              | 11.1*   | 1,828                                    | 14.9  | 104                                    | 21.6*** | 39                                              | 8.5***  |
| Other/ Unknown                                              | 476                                | 8.6   | 35                                     | 9.9    | 30                                              | 5.9*    | 805                                      | 6.6   | 27                                     | 5.6     | 20                                              | 4.3*    |
| Age (Mean ± SD)                                             | 8.2 ± 1.6                          |       | 8.1 ± 1.6                              |        | 8.1 ± 1.6                                       |         | 12.8 ± 3.0                               |       | 13.3 ± 2.7***                          |         | 13.8 ± 2.7***                                   |         |
| Female, %                                                   | 1,786                              | 32.1  | 103                                    | 29.1   | 179                                             | 34.9    | 6,685                                    | 54.5  | 301                                    | 62.4*** | 299                                             | 64.9*** |
| <i>Plan type, %</i>                                         |                                    |       |                                        |        |                                                 |         |                                          |       |                                        |         |                                                 |         |
| Fee-for-service (no carve-out)                              | 362                                | 6.5   | 39                                     | 11.0** | 119                                             | 23.2*** | 1,346                                    | 11.0  | 56                                     | 11.6    | 128                                             | 27.8*** |
| Primary care case management (no carve-out)                 | 1,011                              | 18.2  | 78                                     | 22.0   | 143                                             | 27.9*** | 1,656                                    | 13.5  | 146                                    | 30.3*** | 88                                              | 19.1**  |
| Comprehensive managed care plan (no carve-out) <sup>a</sup> | 2,517                              | 45.2  | 131                                    | 37.0** | 141                                             | 27.5*** | 7,311                                    | 59.6  | 197                                    | 40.9*** | 200                                             | 43.4*** |
| Mixed plans <sup>b</sup>                                    | 1,676                              | 30.1  | 106                                    | 29.9   | 110                                             | 21.4*** | 1,953                                    | 15.9  | 83                                     | 17.2    | 45                                              | 9.8***  |
| <i>Eligibility type, %</i>                                  |                                    |       |                                        |        |                                                 |         |                                          |       |                                        |         |                                                 |         |
| Blind, disabled, or foster care <sup>c</sup>                | 967                                | 17.4  | 75                                     | 21.2   | 81                                              | 15.8    | 2,843                                    | 23.2  | 72                                     | 14.9*** | 70                                              | 15.2*** |
| <i>Mental health comorbidity, %</i>                         |                                    |       |                                        |        |                                                 |         |                                          |       |                                        |         |                                                 |         |
| ADHD                                                        | 5,566                              | 100.0 | 354                                    | 100.0  | 513                                             | 100.0   | 3,947                                    | 32.2  | 148                                    | 30.7    | 124                                             | 26.9*   |
| Any depressive disorder                                     | 240                                | 4.3   | 24                                     | 6.8    | 28                                              | 5.5     | 12,266                                   | 100.0 | 482                                    | 100.0   | 461                                             | 100.0   |
| Depression NOS only                                         | --                                 | --    | --                                     | --     | --                                              | --      | 5,670                                    | 46.2  | 241                                    | 50.0    | 213                                             | 46.2    |
| Dysthymia (no major depression)                             | --                                 | --    | --                                     | --     | --                                              | --      | 1,443                                    | 11.8  | 39                                     | 8.1**   | 37                                              | 8.0**   |
| Any major depression diagnosis                              | --                                 | --    | --                                     | --     | --                                              | --      | 5,153                                    | 42.0  | 202                                    | 41.9    | 211                                             | 45.8    |

**Appendix Table 2 (Continued):** Characteristics of Medicaid-enrolled children and adolescents receiving ADHD-related visits (N=6,433) or depression-related visits (N=13,209), by primary care safety-net setting (FQHC or RHC)

|                                                          | ADHD-related visits in FQHC or RHC |      |                                           |      |                                                    |         | Depression-related visits in FQHC or RHC |      |                                           |         |                                                    |       |
|----------------------------------------------------------|------------------------------------|------|-------------------------------------------|------|----------------------------------------------------|---------|------------------------------------------|------|-------------------------------------------|---------|----------------------------------------------------|-------|
|                                                          | Neither FQHC nor RHC<br>[N=5,566]  |      | Any visit in FQHC<br>[N=354] <sup>±</sup> |      | Any visit in RHC (no FQHC)<br>[N=513] <sup>±</sup> |         | Neither FQHC nor RHC<br>[N=12,266]       |      | Any visit in FQHC<br>[N=482] <sup>±</sup> |         | Any visit in RHC (no FQHC)<br>[N=461] <sup>±</sup> |       |
|                                                          | N                                  | %    | N                                         | %    | N                                                  | %       | N                                        | %    | N                                         | %       | N                                                  | %     |
| <i>Mental health comorbidity, %</i>                      |                                    |      |                                           |      |                                                    |         |                                          |      |                                           |         |                                                    |       |
| Conduct disorder / oppositional defiant disorder         | 962                                | 17.3 | 63                                        | 17.8 | 52                                                 | 10.1*** | 3,034                                    | 24.7 | 87                                        | 18.0*** | 93                                                 | 20.2* |
| Other mental health disorder                             | 1,852                              | 33.3 | 114                                       | 32.2 | 149                                                | 29.0*   | 6,218                                    | 50.7 | 240                                       | 49.8    | 244                                                | 52.9  |
| <i>Physical health comorbidity, %</i>                    |                                    |      |                                           |      |                                                    |         |                                          |      |                                           |         |                                                    |       |
| Asthma                                                   | 915                                | 16.4 | 46                                        | 13.0 | 59                                                 | 11.5**  | 1,615                                    | 13.2 | 66                                        | 13.7    | 60                                                 | 13.0  |
| <i>County-level characteristics (Mean ± SD)</i>          |                                    |      |                                           |      |                                                    |         |                                          |      |                                           |         |                                                    |       |
| Percentage living in urban area                          | 68.5 ± 28.8                        |      | 65.7 ± 30.8                               |      | 43.0 ± 28.4***                                     |         | 67.4 ± 30.5                              |      | 65.2 ± 29.4                               |         | 42.4 ± 32.1***                                     |       |
| Percentage living in poverty                             | 16.9 ± 6.1                         |      | 17.0 ± 5.4                                |      | 19.0 ± 5.3***                                      |         | 16.5 ± 6.3                               |      | 17.3 ± 5.5**                              |         | 19.0 ± 6.3***                                      |       |
| Primary care safety-net facilities per 100K <sup>d</sup> | 2.9 ± 5.4                          |      | 5.7 ± 9.3***                              |      | 12.8 ± 11.7***                                     |         | 3.7 ± 7.4                                |      | 5.6 ± 9.2***                              |         | 14.7 ± 15.5***                                     |       |
| Primary care physicians per 100K                         | 61.5 ± 28.2                        |      | 57.8 ± 27.5*                              |      | 45.7 ± 25.1***                                     |         | 62.4 ± 29.6                              |      | 57.2 ± 25.6***                            |         | 48.8 ± 32.5***                                     |       |
| Psychologists, per 100K                                  | 16.7 ± 18.0                        |      | 17.0 ± 17.4                               |      | 8.6 ± 14.2***                                      |         | 18.7 ± 19.1                              |      | 17.0 ± 17.6*                              |         | 11.6 ± 14.6***                                     |       |

Notes: Abbreviations: FQHC – federally qualified health center; RHC – rural health clinic; SD -- standard deviation

\*  $p < 0.05$ , \*\*  $p < 0.01$ , \*\*\*  $p < 0.001$

<sup>±</sup> Bivariate analyses were conducted using Wald tests to compare the value of each measure or category for those that received some or the majority of their visits in a primary care safety-net clinic to those that did not receive any in these settings (the reference group).

<sup>a</sup>We used monthly information about plan enrollment to measure health plan type. This category includes children who were enrolled in a comprehensive managed care plan for their entire observation period.

<sup>b</sup>This category includes those that were enrolled in more than one plan type during the observation period (including behavioral health plans).

<sup>c</sup> Reference category includes children eligible for Medicaid based on household income, classification as “medically needy”, and/or other criteria specified in each state’s Section 1115 waiver.

<sup>d</sup> Includes federally qualified health centers and rural health clinics.

**Appendix Table 3:** Regression results examining the association between characteristics of Medicaid-enrolled youth and the receipt of ADHD-related visits (N=6,433) or depression-related visits (13,209) in a primary care safety-net setting (FQHC or RHC)

|                                                                              | ADHD-related visits in FQHC or RHC                                 |            |                                                                    |             | Depression-related visits in FQHC or RHC                           |             |                                                                    |             |
|------------------------------------------------------------------------------|--------------------------------------------------------------------|------------|--------------------------------------------------------------------|-------------|--------------------------------------------------------------------|-------------|--------------------------------------------------------------------|-------------|
|                                                                              | Any visit in FQHC                                                  |            | Any visit in RHC (no FQHC)                                         |             | Any visit in FQHC                                                  |             | Any visit in RHC (no FQHC)                                         |             |
|                                                                              | Adjusted Percentage Point Difference <sup>±</sup> (Intercept=5.4%) | 95% CI     | Adjusted Percentage Point Difference <sup>±</sup> (Intercept=8.0%) | 95% CI      | Adjusted Percentage Point Difference <sup>±</sup> (Intercept=3.7%) | 95% CI      | Adjusted Percentage Point Difference <sup>±</sup> (Intercept=3.5%) | 95% CI      |
| <i>Demographics</i>                                                          |                                                                    |            |                                                                    |             |                                                                    |             |                                                                    |             |
| Race/ethnicity                                                               |                                                                    |            |                                                                    |             |                                                                    |             |                                                                    |             |
| Non-Hispanic White                                                           | (Reference)                                                        |            | (Reference)                                                        |             | (Reference)                                                        |             | (Reference)                                                        |             |
| Black                                                                        | 1.8                                                                | 0.1 – 3.4  | -1.2                                                               | -3.0 – 0.7  | -0.3                                                               | -1.6 – 0.9  | -0.3                                                               | -1.4 – 0.7  |
| Hispanic                                                                     | 2.5                                                                | -0.5 – 5.6 | -2.8                                                               | -6.1 – 0.6  | 2.4                                                                | 0.2 – 4.7   | 0.2                                                                | -1.4 – 1.7  |
| Other/ Unknown                                                               | 2.2                                                                | -0.8 – 5.2 | -1.5                                                               | -4.3 – 1.4  | 0.6                                                                | -1.0 – 2.2  | 0.2                                                                | -1.3 – 1.6  |
| Age                                                                          | -0.04                                                              | -0.4 – 0.3 | -0.2                                                               | -0.6 – 0.2  | 0.2                                                                | 0.1 – 0.3   | 0.3                                                                | 0.2 – 0.4   |
| Female                                                                       | -0.2                                                               | -1.3 – 0.9 | 0.1                                                                | -1.1 – 1.4  | 0.9                                                                | 0.3 – 1.6   | 0.7                                                                | 0.1 – 1.3   |
| <i>Plan type</i>                                                             |                                                                    |            |                                                                    |             |                                                                    |             |                                                                    |             |
| Fee-for-service (no carve-out)                                               | (Reference)                                                        |            | (Reference)                                                        |             | (Reference)                                                        |             | (Reference)                                                        |             |
| Primary care case management (no carve-out)                                  | -0.9                                                               | -3.8 – 2.0 | -0.5                                                               | -3.5 – 2.5  | -0.9                                                               | -3.0 – 1.2  | -0.2                                                               | -1.7 – 1.4  |
| Comprehensive managed care plan (no carve-out) <sup>a</sup>                  | -1.8                                                               | -4.2 – 0.6 | -4.2                                                               | -6.9 – -1.4 | -0.9                                                               | -2.1 – 0.3  | -0.3                                                               | -1.6 – 1.0  |
| Mixed plans <sup>b</sup>                                                     | -1.2                                                               | -3.9 – 1.5 | -2.4                                                               | -5.3 – 0.5  | -0.4                                                               | -1.8 – 1.1  | 0.2                                                                | -1.1 – 1.5  |
| <i>Eligibility type</i>                                                      |                                                                    |            |                                                                    |             |                                                                    |             |                                                                    |             |
| Blind, disabled, or foster care (versus other eligibility type) <sup>c</sup> | 0.7                                                                | -1.1 – 2.5 | 0.4                                                                | -1.6 – 2.3  | -1.5                                                               | -2.7 – -0.4 | -1.5                                                               | -2.5 – -0.5 |
| <i>Mental health comorbidity</i>                                             |                                                                    |            |                                                                    |             |                                                                    |             |                                                                    |             |
| ADHD                                                                         | --                                                                 | --         | --                                                                 | --          | 0.6                                                                | -0.1 – 1.4  | 0.6                                                                | -0.1 – 1.2  |

**Appendix Table 3 (Continued):** Regression results examining the association between characteristics of Medicaid-enrolled youth and the receipt of ADHD-related visits (N=6,433) or depression-related visits (13,209) in a primary care safety-net setting (FQHC or RHC)

|                                                          | ADHD-related visits in FQHC or RHC                                  |             |                                                                     |             | Depression-related visits in FQHC or RHC                            |            |                                                                     |             |
|----------------------------------------------------------|---------------------------------------------------------------------|-------------|---------------------------------------------------------------------|-------------|---------------------------------------------------------------------|------------|---------------------------------------------------------------------|-------------|
|                                                          | Any visit in FQHC                                                   |             | Any visit in RHC (no FQHC)                                          |             | Any visit in FQHC                                                   |            | Any visit in RHC (no FQHC)                                          |             |
|                                                          | Adjusted Percentage Point Difference <sup>±</sup> (Intercept= 5.4%) | 95% CI      | Adjusted Percentage Point Difference <sup>±</sup> (Intercept= 8.0%) | 95% CI      | Adjusted Percentage Point Difference <sup>±</sup> (Intercept= 3.7%) | 95% CI     | Adjusted Percentage Point Difference <sup>±</sup> (Intercept= 3.5%) | 95% CI      |
| <i>Mental health comorbidity</i>                         |                                                                     |             |                                                                     |             |                                                                     |            |                                                                     |             |
| Any depressive disorder                                  | 2.0                                                                 | -1.0 – 5.1  | 1.8                                                                 | -0.9 – 4.4  | --                                                                  | --         | --                                                                  | --          |
| Depression NOS only                                      | --                                                                  | --          | --                                                                  | --          | (Reference)                                                         |            | (Reference)                                                         |             |
| Dysthymia (no major depression)                          | --                                                                  | --          | --                                                                  | --          | -0.8                                                                | -2.1 – 0.4 | -1.6                                                                | -2.9 – -0.2 |
| Any major depression diagnosis                           | --                                                                  | --          | --                                                                  | --          | -0.6                                                                | -1.4 – 0.2 | -0.3                                                                | -1.0 – 0.4  |
| Conduct disorder / oppositional defiant disorder         | 0.9                                                                 | -1.0 – 2.8  | -3.0                                                                | -5.2 – -0.8 | -0.4                                                                | -1.3 – 0.6 | -0.3                                                                | -1.1 – 0.4  |
| Other mental health disorder                             | 0.5                                                                 | -0.8 – 1.8  | -0.8                                                                | -2.2 – 0.7  | 0.6                                                                 | -0.1 – 1.2 | 0.4                                                                 | -0.3 – 1.1  |
| <i>Physical health comorbidity</i>                       |                                                                     |             |                                                                     |             |                                                                     |            |                                                                     |             |
| Asthma                                                   | -1.1                                                                | -2.8 – 0.5  | -1.7                                                                | -3.5 – 0.1  | 0.7                                                                 | -0.2 – 1.6 | -0.1                                                                | -0.9 – 0.8  |
| <i>County-level characteristics</i>                      |                                                                     |             |                                                                     |             |                                                                     |            |                                                                     |             |
| Percentage living in urban area                          | 0.3                                                                 | -0.7 – 1.3  | -3.1                                                                | -4.3 – -1.9 | -0.4                                                                | -1.1 – 0.3 | -1.4                                                                | -2.1 – -0.6 |
| Percentage living in poverty                             | -1.2                                                                | -2.1 – -0.2 | 0.4                                                                 | -0.9 – 1.6  | -0.2                                                                | -0.8 – 0.5 | 0.3                                                                 | -0.3 – 0.9  |
| Primary care safety-net facilities per 100K <sup>d</sup> | 2.4                                                                 | 1.6 – 3.2   | 2.8                                                                 | 1.8 – 3.7   | 0.8                                                                 | 0.3 – 1.2  | 0.8                                                                 | 0.4 – 1.2   |
| Primary care physicians per 100K                         | -0.5                                                                | -1.5 – 0.5  | -0.1                                                                | -1.3 – 1.1  | -0.4                                                                | -0.9 – 0.1 | 0.1                                                                 | -0.7 – 0.8  |
| Psychologists, per 100K                                  | 1.1                                                                 | -0.1 – 2.3  | -0.9                                                                | -2.5 – 0.7  | 0.8                                                                 | 0.1 – 1.6  | -0.2                                                                | -0.8 – 0.5  |

Notes: Abbreviations: FQHC – federally qualified health center; RHC – rural health clinic.

\*  $p < 0.05$ , \*\*  $p < 0.01$ , \*\*\*  $p < 0.001$

<sup>±</sup>Generalized ordered logistic regression was estimated with state indicators and standard errors were clustered at the county level.

<sup>a</sup>We used monthly information about plan enrollment to measure health plan type. This category includes children who were enrolled in a comprehensive managed care plan for their entire observation period.

<sup>b</sup>This category includes those that were enrolled in more than one plan type during the observation period (including behavioral health plans).

<sup>c</sup>Reference category includes children eligible for Medicaid based on household income, classification as “medically needy”, and/or other criteria specified in each state’s Section 1115 waiver.

<sup>d</sup>Includes federally qualified health centers and rural health clinics.

**Appendix Table 4:** Regression results examining association between treatment in a primary care safety-net setting and the receipt of adequate follow-up care and continuous medication, among Medicaid-enrolled youth initiating ADHD medication

|                                                                              | Percentage of youth that received $\geq 1$ follow-up visit in initiation phase (N=6,433) |               | Percentage of youth that continued medication (N=5,968) |               | Percentage of youth that received adequate follow-up care in C&M phase (N=2,370) |               |
|------------------------------------------------------------------------------|------------------------------------------------------------------------------------------|---------------|---------------------------------------------------------|---------------|----------------------------------------------------------------------------------|---------------|
|                                                                              | Adjusted Percentage Point Difference <sup>±</sup>                                        | 95% CI        | Adjusted Percentage Point Difference <sup>±</sup>       | 95% CI        | Adjusted Percentage Point Difference <sup>±</sup>                                | 95% CI        |
| No ADHD-related visit in primary care safety-net (reference)                 | (intercept = 63.8)                                                                       |               | (intercept = 39.7)                                      |               | (intercept = 69.3)                                                               |               |
| Some (but less than half) of ADHD-related visits in safety-net               | 7.9                                                                                      | 1.5 – 14.2    | 7.6                                                     | 1.4 – 13.8    | 5.6                                                                              | -3.1 – 14.4   |
| Majority of ADHD-related visits in safety-net                                | -27.7                                                                                    | -32.5 – -23.0 | -6.6                                                    | -11.2 – -2.1  | -24.3                                                                            | -31.4 – -17.3 |
| <i>Demographics</i>                                                          |                                                                                          |               |                                                         |               |                                                                                  |               |
| Race/ethnicity                                                               |                                                                                          |               |                                                         |               |                                                                                  |               |
| Non-Hispanic White                                                           | (Reference)                                                                              |               | (Reference)                                             |               | (Reference)                                                                      |               |
| Black                                                                        | -6.7                                                                                     | -9.8 – -3.5   | -22.6                                                   | -25.9 – -19.4 | -2.6                                                                             | -7.5 – 2.3    |
| Hispanic                                                                     | 0.3                                                                                      | -3.8 – 4.5    | -20.8                                                   | -25.4 – -16.3 | 8.9                                                                              | 2.1 – 15.7    |
| Other/ Unknown                                                               | -2.6                                                                                     | -8.0 – 2.7    | -20.7                                                   | -25.6 – -15.8 | 2.1                                                                              | -5.8 – 10.0   |
| Age                                                                          |                                                                                          |               |                                                         |               |                                                                                  |               |
| Female (versus male)                                                         | 0.4                                                                                      | -1.8 – 2.6    | 0.3                                                     | -2.1 – 2.7    | -0.8                                                                             | -4.6 – 3.1    |
| <i>Plan type</i>                                                             |                                                                                          |               |                                                         |               |                                                                                  |               |
| Fee-for-service (no carve-out)                                               | (Reference)                                                                              |               | (Reference)                                             |               | (Reference)                                                                      |               |
| Primary care case management (no carve-out)                                  | 2.2                                                                                      | -3.8 – 8.2    | -1.6                                                    | -7.9 – 4.8    | 1.5                                                                              | -7.9 – 11.0   |
| Comprehensive managed care plan (no carve-out) <sup>a</sup>                  | 3.7                                                                                      | -1.4 – 8.8    | -4.1                                                    | -10.0 – 1.7   | 7.7                                                                              | -0.1 – 15.6   |
| Mixed plans <sup>b</sup>                                                     | -4.2                                                                                     | -9.6 – 1.2    | -6.1                                                    | -11.6 – -0.7  | 0.01                                                                             | -8.9 – 9.0    |
| <i>Eligibility type</i>                                                      |                                                                                          |               |                                                         |               |                                                                                  |               |
| Blind, disabled, or foster care (versus other eligibility type) <sup>c</sup> | -2.1                                                                                     | -5.7 – 1.6    | 10.2                                                    | 6.3 – 14.0    | -1.3                                                                             | -7.1 – 4.6    |

**Appendix Table 4 (Continued):** Regression results examining association between treatment in a primary care safety-net setting and the receipt of adequate follow-up care and continuous medication, among Medicaid-enrolled youth initiating ADHD medication

|                                                          | Percentage of youth that received $\geq 1$ follow-up visit in initiation phase (N=6,433) |            | Percentage of youth that continued medication (N=5,968) |             | Percentage of youth that received adequate follow-up care in C&M phase (N=2,370) |             |
|----------------------------------------------------------|------------------------------------------------------------------------------------------|------------|---------------------------------------------------------|-------------|----------------------------------------------------------------------------------|-------------|
|                                                          | Adjusted Percentage Point Difference <sup>±</sup>                                        | 95% CI     | Adjusted Percentage Point Difference <sup>±</sup>       | 95% CI      | Adjusted Percentage Point Difference <sup>±</sup>                                | 95% CI      |
| <i>Mental health comorbidity</i>                         |                                                                                          |            |                                                         |             |                                                                                  |             |
| Any depressive disorder                                  | 11.0                                                                                     | 4.4 – 17.5 | 4.9                                                     | -1.3 – 11.1 | 8.1                                                                              | -2.7 – 18.9 |
| Conduct disorder / oppositional defiant disorder         | 13.2                                                                                     | 9.6 – 16.8 | 3.4                                                     | 0.2 – 6.7   | 14.8                                                                             | 9.4 – 20.2  |
| Other mental health disorder                             | 10.6                                                                                     | 8.0 – 13.2 | 5.8                                                     | 3.1 – 8.6   | 9.3                                                                              | 5.2 – 13.3  |
| <i>Physical health comorbidity</i>                       |                                                                                          |            |                                                         |             |                                                                                  |             |
| Asthma                                                   | 5.2                                                                                      | 2.3 – 8.2  | 0.4                                                     | -2.9 – 3.7  | 3.2                                                                              | -1.9 – 8.3  |
| <i>County-level characteristics</i>                      |                                                                                          |            |                                                         |             |                                                                                  |             |
| Percentage living in urban area                          | -1.0                                                                                     | -2.9 – 1.0 | -0.1                                                    | -2.0 – 1.8  | 0.1                                                                              | -2.9 – 3.1  |
| Percentage living in poverty                             | 1.0                                                                                      | -0.5 – 2.4 | -1.7                                                    | -3.3 – -0.1 | 1.2                                                                              | -1.4 – 3.9  |
| Primary care safety-net facilities per 100K <sup>d</sup> | -0.8                                                                                     | -2.4 – 0.8 | 0.2                                                     | -1.5 – 1.8  | -1.7                                                                             | -4.0 – 0.6  |
| Primary care physicians per 100K                         | 1.0                                                                                      | -0.8 – 2.9 | 0.3                                                     | -1.5 – 2.1  | 0.4                                                                              | -2.5 – 3.4  |
| Psychologists, per 100K                                  | -0.4                                                                                     | -2.5 – 1.7 | -0.5                                                    | -2.5 – 1.4  | -1.4                                                                             | -4.7 – 1.9  |

Notes: <sup>±</sup>Logistic regressions were estimated with state indicators and standard errors were clustered at the county level.

<sup>a</sup> We used monthly information about plan enrollment to measure health plan type. This category includes children who were enrolled in a comprehensive managed care plan for their entire observation period.

<sup>b</sup> This category includes those that were enrolled in more than one plan type during the observation period (including behavioral health plans).

<sup>c</sup> Reference category includes children eligible for Medicaid based on household income, classification as “medically needy”, and/or other criteria specified in each state’s Section 1115 waiver.

<sup>d</sup> Includes federally qualified health centers and rural health clinics.

**Appendix Table 5:** Regression results examining association between treatment in a primary care safety-net setting and the receipt of adequate follow-up care and continuous medication, among Medicaid-enrolled youth with index depression diagnosis

|                                                                              | Percentage of youth that received minimally adequate psychotherapy ( $\geq 4$ therapy visits) <sup>†</sup> |               | Percentage of youth that received minimally adequate pharmacotherapy (84 / 144 days) <sup>†</sup> |              | Percentage of youth that received minimally adequate treatment (psychotherapy or medication) <sup>†</sup> |              |
|------------------------------------------------------------------------------|------------------------------------------------------------------------------------------------------------|---------------|---------------------------------------------------------------------------------------------------|--------------|-----------------------------------------------------------------------------------------------------------|--------------|
|                                                                              | Adjusted Percentage Point Difference <sup>±</sup> (Intercept = 32.9)                                       | 95% CI        | Adjusted Percentage Point Difference <sup>±</sup> (Intercept = 16.1)                              | 95% CI       | Adjusted Percentage Point Difference <sup>±</sup> (Intercept = 43.8)                                      | 95% CI       |
| No depression-related visit in primary care safety-net (reference)           | —                                                                                                          | —             | —                                                                                                 | —            | —                                                                                                         | —            |
| Some (but less than half) of depression-related visits in safety-net         | -3.1                                                                                                       | -8.3 – 2.0    | 9.3                                                                                               | 5.8 – 12.9   | 4.0                                                                                                       | -1.6 – 9.7   |
| Majority of depression-related visits in safety-net                          | -19.9                                                                                                      | -25.3 – -14.5 | 4.0                                                                                               | 0.9 – 7.1    | -9.5                                                                                                      | -14.6 – -4.4 |
| <i>Demographics</i>                                                          |                                                                                                            |               |                                                                                                   |              |                                                                                                           |              |
| <i>Race/ethnicity</i>                                                        |                                                                                                            |               |                                                                                                   |              |                                                                                                           |              |
| Non-Hispanic White                                                           | (Reference)                                                                                                |               | (Reference)                                                                                       |              | (Reference)                                                                                               |              |
| Black                                                                        | -7.4                                                                                                       | -9.8 – -4.9   | -8.3                                                                                              | -10.1 – -6.4 | -12.5                                                                                                     | -15.1 – -9.9 |
| Hispanic                                                                     | -4.2                                                                                                       | -8.9 – 0.5    | -6.3                                                                                              | -8.8 – -3.9  | -8.5                                                                                                      | -13.1 – -3.9 |
| Other/ Unknown                                                               | -11.3                                                                                                      | -15.3 – -7.3  | -0.6                                                                                              | -3.3 – 2.0   | -9.7                                                                                                      | -13.7 – -5.7 |
| <i>Age</i>                                                                   |                                                                                                            |               |                                                                                                   |              |                                                                                                           |              |
| Female (versus male)                                                         | 1.2                                                                                                        | -0.6 – 3.0    | 3.5                                                                                               | 2.2 – 4.7    | 3.4                                                                                                       | 1.6 – 5.2    |
| <i>Plan type</i>                                                             |                                                                                                            |               |                                                                                                   |              |                                                                                                           |              |
| Fee-for-service (no carve-out)                                               | (Reference)                                                                                                |               | (Reference)                                                                                       |              | (Reference)                                                                                               |              |
| Primary care case management (no carve-out)                                  | -2.0                                                                                                       | -7.2 – 3.1    | 0.5                                                                                               | -2.6 – 3.7   | 0.5                                                                                                       | -5.1 – 6.1   |
| Comprehensive managed care plan (no carve-out) <sup>a</sup>                  | -7.2                                                                                                       | -11.5 – -2.9  | 2.2                                                                                               | -0.2 – 4.6   | -3.4                                                                                                      | -8.1 – 1.2   |
| Mixed plans <sup>b</sup>                                                     | -8.3                                                                                                       | -12.7 – -3.8  | 1.1                                                                                               | -1.9 – 4.1   | -5.8                                                                                                      | -10.6 – -1.1 |
| <i>Eligibility type</i>                                                      |                                                                                                            |               |                                                                                                   |              |                                                                                                           |              |
| Blind, disabled, or foster care (versus other eligibility type) <sup>c</sup> | 8.4                                                                                                        | 4.5 – 12.4    | 0.2                                                                                               | -1.4 – 1.7   | 8.0                                                                                                       | 4.1 – 12.0   |



**Appendix Table 5 (Continued):** Regression results examining association between treatment in a primary care safety-net setting and the receipt of adequate follow-up care and continuous medication, among Medicaid-enrolled youth with index depression diagnosis

|                                                          | Percentage of youth that received minimally adequate psychotherapy ( $\geq 4$ therapy visits) <sup>†</sup> |             | Percentage of youth that received minimally adequate pharmacotherapy (84 / 144 days) <sup>†</sup> |             | Percentage of youth that received minimally adequate treatment (psychotherapy or medication) <sup>†</sup> |             |
|----------------------------------------------------------|------------------------------------------------------------------------------------------------------------|-------------|---------------------------------------------------------------------------------------------------|-------------|-----------------------------------------------------------------------------------------------------------|-------------|
|                                                          | Adjusted Percentage Point Difference <sup>±</sup> (Intercept = 32.9)                                       | 95% CI      | Adjusted Percentage Point Difference <sup>±</sup> (Intercept = 16.1)                              | 95% CI      | Adjusted Percentage Point Difference <sup>±</sup> (Intercept = 43.8)                                      | 95% CI      |
| <i>Mental health comorbidity</i>                         |                                                                                                            |             |                                                                                                   |             |                                                                                                           |             |
| Type of depressive disorder                              |                                                                                                            |             |                                                                                                   |             |                                                                                                           |             |
| Depression NOS only                                      |                                                                                                            | (Reference) |                                                                                                   | (Reference) |                                                                                                           | (Reference) |
| Dysthymia (no major depression)                          | 5.8                                                                                                        | 2.8 – 8.7   | -3.8                                                                                              | -6.8 – -0.8 | 5.2                                                                                                       | 1.8 – 8.5   |
| Any major depression diagnosis                           | 3.8                                                                                                        | 1.9 – 5.8   | 6.8                                                                                               | 5.2 – 8.4   | 7.4                                                                                                       | 5.5 – 9.4   |
| ADHD                                                     | -0.1                                                                                                       | -2.1 – 1.8  | 3.0                                                                                               | 1.5 – 4.4   | 1.9                                                                                                       | -0.2 – 4.1  |
| Conduct disorder / oppositional defiant disorder         | 4.5                                                                                                        | 2.4 – 6.6   | -0.5                                                                                              | -2.1 – 1.1  | 3.0                                                                                                       | 0.8 – 5.1   |
| Other mental health disorder                             | 7.3                                                                                                        | 5.5 – 9.2   | 7.5                                                                                               | 6.3 – 8.8   | 10.0                                                                                                      | 8.2 – 11.8  |
| <i>Physical health comorbidity</i>                       |                                                                                                            |             |                                                                                                   |             |                                                                                                           |             |
| Asthma                                                   | 0.1                                                                                                        | -2.2 – 2.3  | 2.2                                                                                               | 0.4 – 4.0   | 1.6                                                                                                       | -0.7 – 4.0  |
| <i>County-level characteristics</i>                      |                                                                                                            |             |                                                                                                   |             |                                                                                                           |             |
| Percentage living in urban area                          | 0.03                                                                                                       | -1.7 – 1.8  | -0.7                                                                                              | -1.7 – 0.3  | -0.7                                                                                                      | -2.5 – 1.0  |
| Percentage living in poverty                             | -1.8                                                                                                       | -3.1 – -0.5 | -0.6                                                                                              | -1.4 – 0.2  | -2.0                                                                                                      | -3.3 – -0.8 |
| Primary care safety-net facilities per 100K <sup>d</sup> | 0.5                                                                                                        | -1.0 – 2.0  | -0.5                                                                                              | -1.5 – 0.5  | -0.3                                                                                                      | -1.9 – 1.3  |
| Primary care physicians per 100K                         | 0.1                                                                                                        | -1.7 – 1.8  | 0.6                                                                                               | -0.5 – 1.6  | 0.7                                                                                                       | -1.0 – 2.4  |
| Psychologists, per 100K                                  | 1.0                                                                                                        | -0.9 – 3.0  | -0.6                                                                                              | -1.7 – 0.5  | 0.3                                                                                                       | -1.8 – 2.4  |

Notes: <sup>†</sup>N=13,209; <sup>±</sup>Logistic regressions were estimated with state indicators and standard errors were clustered at the county level.

<sup>a</sup>We used monthly information about plan enrollment to measure health plan type. This category includes children who were enrolled in a comprehensive managed care plan for their entire observation period.

<sup>b</sup>This category includes those that were enrolled in more than one plan type during the observation period (including behavioral health plans).

<sup>c</sup> Reference category includes children eligible for Medicaid based on household income, classification as “medically needy”, and/or other criteria specified in each state’s Section 1115 waiver.

<sup>d</sup>Includes federally qualified health centers and rural health clinics.

**Appendix Table 6:** Psychotherapy services received inside and outside of primary care safety-net clinic in cohort initiating ADHD medication

|                                                                                              | Received any ADHD-related visits in primary care safety-net clinic<br>[n=867 <sup>a</sup> ] |     |                                               |      |                                |      | Never used primary care safety-net clinic for ADHD-related visits<br>[N=5,566] |      |
|----------------------------------------------------------------------------------------------|---------------------------------------------------------------------------------------------|-----|-----------------------------------------------|------|--------------------------------|------|--------------------------------------------------------------------------------|------|
|                                                                                              | Visits in primary care safety-net clinic                                                    |     | Visits outside primary care safety-net clinic |      | All ADHD-related psychotherapy |      | All ADHD-related psychotherapy                                                 |      |
|                                                                                              | N                                                                                           | %   | N                                             | %    | N                              | %    | N                                                                              | %    |
| Any individual psychotherapy visit, %                                                        | 40                                                                                          | 4.6 | 127                                           | 14.7 | 158                            | 18.2 | 1,265                                                                          | 22.7 |
| Any psychotherapy visit (individual, family, or group), %                                    | 63                                                                                          | 7.3 | 169                                           | 19.5 | 216                            | 24.9 | 1,571                                                                          | 28.2 |
| Number of psychotherapy visits (for those with any psychotherapy in each setting), Mean ± SD | 4.4 ± 5.8 <sup>b</sup>                                                                      |     | 7.2 ± 9.5 <sup>c</sup>                        |      | 6.9 ± 9.0 <sup>d</sup>         |      | 6.7 ± 8.4 <sup>e</sup>                                                         |      |

*Notes:*

<sup>a</sup>ADHD sample that received any ADHD care in PC safety-net clinic.

<sup>b</sup>n=63 children in the ADHD sample who received any psychotherapy in primary care safety-net clinic.

<sup>c</sup>n=169 children in the ADHD sample who received any ADHD-related care in primary care safety-net clinic also received any psychotherapy outside of primary care safety-net.

<sup>d</sup>n=216 children in the ADHD sample who received any ADHD-related care in primary care safety-net clinic and also received any psychotherapy.

<sup>e</sup>n= 1,571 children who never used primary care safety-net clinic for ADHD and received any psychotherapy in any setting.

**Appendix Table 7: Psychotherapy services received inside and outside of primary care safety-net clinic in cohort with index depression diagnosis**

|                                                                                              | Received any depression-related visits in primary care safety-net clinic [n=943 <sup>a</sup> ] |      |                                               |      |                                      |      | Never used primary care safety-net clinic for depression-related visits [N=12,266] |      |
|----------------------------------------------------------------------------------------------|------------------------------------------------------------------------------------------------|------|-----------------------------------------------|------|--------------------------------------|------|------------------------------------------------------------------------------------|------|
|                                                                                              | Visits in primary care safety-net clinic                                                       |      | Visits outside primary care safety-net clinic |      | All depression-related psychotherapy |      | All depression-related psychotherapy                                               |      |
|                                                                                              | N                                                                                              | %    | N                                             | %    | N                                    | %    | N                                                                                  | %    |
| <i>Psychotherapy</i>                                                                         |                                                                                                |      |                                               |      |                                      |      |                                                                                    |      |
| Any individual psychotherapy visit, %                                                        | 154                                                                                            | 16.3 | 340                                           | 36.1 | 346                                  | 36.7 | 6,142                                                                              | 50.1 |
| Any psychotherapy visit (individual, family, and/or group), %                                | 210                                                                                            | 22.3 | 402                                           | 42.6 | 409                                  | 43.4 | 7,086                                                                              | 57.8 |
| Number of psychotherapy visits (for those with any psychotherapy in each setting), Mean ± SD | 3.7 ± 3.6 <sup>b</sup>                                                                         |      | 6.9 ± 7.9 <sup>c</sup>                        |      | 6.9 ± 7.9 <sup>d</sup>               |      | 7.2 ± 8.0 <sup>e</sup>                                                             |      |

Notes: Abbreviations:

<sup>a</sup>Depression sample that received any depression care in primary care safety-net clinic.

<sup>b</sup>n=210 children in the depression sample who received any psychotherapy in primary care safety-net clinic.

<sup>c</sup>n=402 children in the depression sample who received any depression-related visits in primary care safety-net clinic, and also received any psychotherapy outside of primary care safety-net clinic.

<sup>d</sup>n=409 children in the depression sample who received any depression-related visits in primary care safety-net clinic, and also received psychotherapy in any setting.

<sup>e</sup>n=7,086 children who never used primary care safety-net clinic for depression and received psychotherapy.
